# Supplementary material for: Differences in the population structure of Neisseria meningitidis in two Australian states: Victoria and Western Australia
Source: PubMed Central journal article supplement (PMC5655437; doi:10.1371/journal.pone.0186839), 2017-10-24
Supplement: pone.0186839.s002.pdf [file pone.0186839.s002.pdf]

**S1 Table. Distribution of clonal complexes in VIC and WA (2008-12)**

|                       | VIC                    |                   | WA                     |                   |                                   |
|-----------------------|------------------------|-------------------|------------------------|-------------------|-----------------------------------|
| <b>Clonal complex</b> | <b>No. of isolates</b> | <b>Proportion</b> | <b>No. of isolates</b> | <b>Proportion</b> | <b><i>p</i> value<sup>a</sup></b> |
| cc11                  | 4                      | 3.1%              | 4                      | 5.7%              | 0.1872                            |
| cc22                  | 7                      | 5.3%              | 0                      | 0.0%              | 0.0472                            |
| cc23                  | 6                      | 4.6%              | 4                      | 5.7%              | 0.2425                            |
| cc32                  | 20                     | 15.3%             | 11                     | 15.7%             | 0.1609                            |
| cc35                  | 3                      | 2.3%              | 2                      | 2.9%              | 0.3400                            |
| cc60                  | 0                      | 0.0%              | 2                      | 2.9%              | 0.1201                            |
| cc103                 | 2                      | 1.5%              | 0                      | 0.0%              | 0.4236                            |
| cc162                 | 2                      | 1.5%              | 1                      | 1.4%              | 0.4470                            |
| cc167                 | 1                      | 0.8%              | 2                      | 2.9%              | 0.2373                            |
| cc212                 | 0                      | 0.0%              | 1                      | 1.4%              | 0.3483                            |
| cc213                 | 13                     | 9.9%              | 9                      | 12.9%             | 0.1495                            |
| cc269                 | 24                     | 18.3%             | 8                      | 11.4%             | 0.0745                            |
| cc461                 | 1                      | 0.8%              | 3                      | 4.3%              | 0.1087                            |
| cc1157                | 1                      | 0.8%              | 0                      | 0.0%              | 0.6571                            |
| cc41/44               | 44                     | 33.6%             | 23                     | 32.9%             | 0.1242                            |
| unassigned            | 3                      | 2.3%              | 0                      | 0.0%              | 0.2746                            |
| Subtotal              | 131                    | 100.0%            | 70                     | 100.0%            |                                   |

<sup>a</sup>The *p*-value was calculated using the Fisher's exact test.
