# Supplementary material for: Differences in the population structure of Neisseria meningitidis in two Australian states: Victoria and Western Australia
Source: PubMed Central journal article supplement (PMC5655437; doi:10.1371/journal.pone.0186839), 2017-10-24
Supplement: pone.0186839.s003.pdf [file pone.0186839.s003.pdf]

**S2 Table. Antigenic diversity in meningococcal isolates from VIC and WA (2008-2012)**

| Genotype              | No. of molecular types |              |                                 | Most common molecular type |                 |
|-----------------------|------------------------|--------------|---------------------------------|----------------------------|-----------------|
|                       | VIC<br>(n=131)         | WA<br>(n=70) | Entire<br>collection<br>(n=201) | VIC                        | WA              |
| <b>Clonal complex</b> | 13                     | 12           | 15                              | cc41/44                    | cc41/44         |
| <b>ST</b>             | 52                     | 40           | 82                              | ST-6058                    | ST-146          |
| <b>FetA:</b>          |                        |              |                                 |                            |                 |
| alleles               | 37                     | 36           | 60                              | allele 20                  | allele 20       |
| peptides              | 17                     | 15           | 21                              | F1-5                       | F1-5            |
| <b>PorA:</b>          |                        |              |                                 |                            |                 |
| alleles               | 34                     | 32           | 49                              | allele 241                 | allele 101      |
| peptides              | 30                     | 28           | 43                              | P1.7,16-26                 | P1.22,14-6      |
| <b>PorA:FetA</b>      | 44                     | 43           | 75                              | P1.7,16-26:F3-3            | P1.22,14-6:F1-5 |
| <b>fHbp:</b>          |                        |              |                                 |                            |                 |
| alleles               | 38                     | 24           | 40                              | allele 4                   | allele 19       |

|              |    |    |     |                                             |                                              |
|--------------|----|----|-----|---------------------------------------------|----------------------------------------------|
| mutations*   | 1  | 2  | 3   | -                                           | -                                            |
| peptides     | 30 | 22 | 37  | fHbp-1.4                                    | fHbp-2.19                                    |
| <b>NHBA:</b> |    |    |     |                                             |                                              |
| alleles      | 22 | 24 | 32  | allele 1                                    | allele 5; allele58                           |
| peptides     | 20 | 21 | 27  | NHBA-2                                      | NHBA-3; NHBA-43                              |
| <b>NadA:</b> |    |    |     |                                             |                                              |
| alleles      | 7  | 6  | 7   | -                                           | -                                            |
| mutations    | 4  | 3  | 4   | -                                           | -                                            |
| peptides     | 3  | 3  | 3   | -                                           | -                                            |
| <b>BAST</b>  | 66 | 51 | 108 | fHbp-2.19:NHBA-2:NadA-<br>absent:P1.18-1,34 | fHbp-2.19:NHBA-43:NadA-<br>absent:P1.22,14-6 |
|              |    |    |     |                                             |                                              |

\*deletion or frameshift mutations
