# Supplementary material for: Differences in the population structure of Neisseria meningitidis in two Australian states: Victoria and Western Australia
Source: PubMed Central journal article supplement (PMC5655437; doi:10.1371/journal.pone.0186839), 2017-10-24
Supplement: pone.0186839.s004.pdf [file pone.0186839.s004.pdf]

**S3 Table. Annual prevalence of the fHbp-1 variant in VIC and WA during 2008-2012.**

| Year         | VIC             |                                               | WA              |                                               | <i>p</i> -value <sup>a</sup> |
|--------------|-----------------|-----------------------------------------------|-----------------|-----------------------------------------------|------------------------------|
|              | No. of isolates | No. of isolates possessing alleles for fHbp-1 | No. of isolates | No. of isolates possessing alleles for fHbp-1 |                              |
| <b>2008</b>  | 31              | 19                                            | 15              | 5                                             | 0.054                        |
| <b>2009</b>  | 22              | 13                                            | 18              | 8                                             | 0.166                        |
| <b>2010</b>  | 28              | 12                                            | 12              | 5                                             | 0.272                        |
| <b>2011</b>  | 30              | 14                                            | 13              | 6                                             | 0.260                        |
| <b>2012</b>  | 20              | 11                                            | 12              | 2                                             | 0.032                        |
| <b>Total</b> | 131             | 69                                            | 70              | 26                                            | 0.013                        |

<sup>a</sup>The *p*-value was calculated using the Fisher's exact test.
